# Supplementary material for: NGS Analysis Confirms Common TP53 and RB1 Mutations, and Suggests MYC Amplification in Ocular Adnexal Sebaceous Carcinomas
Source: MDPI journal article supplement (doi:10.3390/ijms22168454), 2021-08-06
Supplement: s1 [file s1]

## Supplementary Materials:

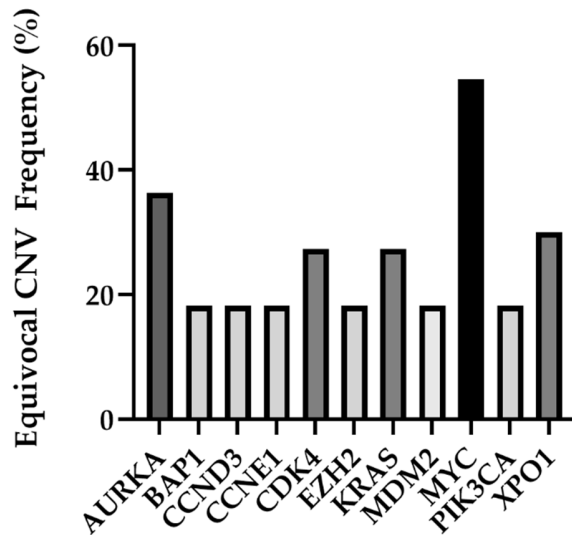

**Supplemental Figure S1. Frequency of genes with equivocal copy number gains (mean log<sub>2</sub> ratio > 0.5) in sebaceous carcinomas.**

### NGS Solid Tumor Panel-Limited Methodology (Case 11 only):

This assay uses next-generation sequencing to analyze the most frequently mutated regions of the following 27 cancer genes: *ABL1* (NM\_007313), *AKT1* (NM\_005163), *ATM* (NM\_000051), *BRAF* (NM\_004333), *CDKN2A* (NM\_000077), *EGFR* (NM\_005228), *ERBB2* (NM\_004448), *FGFR1* (NM\_015850), *FGFR2* (NM\_000141), *FGFR3* (NM\_000142), *GNA11* (NM\_002067), *GNAQ* (NM\_002072), *HRAS* (NM\_005343), *IDH1* (NM\_005896), *IDH2* (NM\_002168), *KIT* (NM\_000222), *KRAS* (NM\_004985), *MET* (NM\_000245), *MLH1* (NM\_000249), *NRAS* (NM\_002524), *POGFRA* (NM\_006206), *PIK3CA* (NM\_006218), *PTEN* (NM\_000314), *RB1* (NM\_000321), *RET* (NM\_020975), *SMO* (NM\_005631), and *TP53* (NM\_000546).
